# Supplementary material for: Electronic structure of CuTPP and CuTPP(F) complexes: a combined experimental and theoretical study II
Source: Royal Society of Chemistry journal article supplement (doi:10.1039/c6cp03956a), 2016-01-01
Supplement: c6cp03956a1.pdf [file c6cp03956a1.pdf]

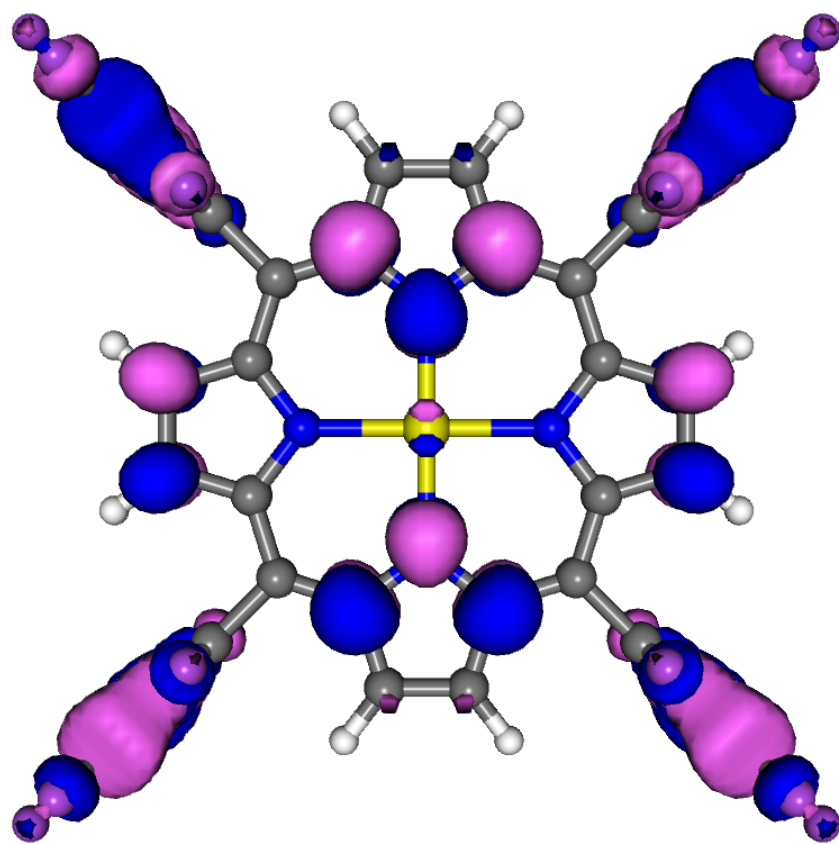

25e<sub>g</sub>

**Table S1-ESI.** Energy-ordered  $1s^{C/N/F}$ -based linear combinations of CuTPP and CuTPP(F) in  $D_{4h}$  symmetry. The atom numbering corresponds to the one recommended by the IUPAC and adopted in Fig. 1.

| CuTPP                    | $a_{1g}$ | $a_{2g}$ | $b_{1g}$ | $b_{2g}$ | $e_g$ | $a_{1u}$ | $a_{2u}$ | $b_{1u}$ | $b_{2u}$ | $e_u$ |
|--------------------------|----------|----------|----------|----------|-------|----------|----------|----------|----------|-------|
| N                        | 3        |          | 1        |          |       |          |          |          |          | 2     |
| $C^1(C^{Py})$            | 4        | 1        | 2        | 1        |       |          |          |          |          | 3/4   |
| $C^2(C^{Py})$            | 10       | 2        | 3        | 7        |       |          |          |          |          | 10/11 |
| $C^5(C^m)$               | 5        |          |          | 2        |       |          |          |          |          | 5     |
| $C^{25}(C_{  }^{Ph})$    | 6        |          |          | 3        |       |          |          |          |          | 6     |
| $C^{29}(C_{\perp}^{Ph})$ | 8        |          |          | 5        | 2     |          | 3        | 2        |          | 8     |
| $C^{37}(C_{\perp}^{Ph})$ | 7        |          |          | 4        | 1     |          | 2        | 1        |          | 7     |
| $C^{45}(C_{  }^{Ph})$    | 9        |          |          | 6        |       |          |          |          |          | 9     |

| CuTPP(F)                 | $a_{1g}$ | $a_{2g}$ | $b_{1g}$ | $b_{2g}$ | $e_g$ | $a_{1u}$ | $a_{2u}$ | $b_{1u}$ | $b_{2u}$ | $e_u$ |
|--------------------------|----------|----------|----------|----------|-------|----------|----------|----------|----------|-------|
| $F^{49}(F_{\perp})$      | 5        |          |          | 3        | 2     |          | 3        | 2        |          | 4     |
| $F^{57}(F_{\perp})$      | 4        |          |          | 2        | 1     |          | 2        | 1        |          | 3     |
| $F^{65}(F_{  })$         | 3        |          |          | 1        |       |          |          |          |          | 2     |
| N                        | 6        |          | 1        |          |       |          |          |          |          | 5     |
| $C^1(C^{Py})$            | 11       | 1        | 2        | 8        |       |          |          |          |          | 10/11 |
| $C^2(C^{Py})$            | 13       | 2        | 3        | 10       |       |          |          |          |          | 13/14 |
| $C^5(C^m)$               | 12       |          |          | 9        |       |          |          |          |          | 12    |
| $C^{25}(C_{  }^{Ph})$    | 10       |          |          | 7        |       |          |          |          |          | 9     |
| $C^{29}(C_{\perp}^{Ph})$ | 9        |          |          | 6        | 4     |          | 5        | 4        |          | 8     |
| $C^{37}(C_{\perp}^{Ph})$ | 8        |          |          | 5        | 3     |          | 4        | 3        |          | 7     |
| $C^{45}(C_{  }^{Ph})$    | 7        |          |          | 4        |       |          |          |          |          | 6     |

**Table S2a-ESI.**  $\Gamma_{XS}$  representation products corresponding to electric dipole allowed transitions in  $D_{4h}$  symmetry.

| $\otimes(a_{2u}+e_u)\otimes$ | $a_{1g}$ | $a_{2g}$ | $b_{1g}$ | $b_{2g}$ | $e_g$ | $a_{1u}$ | $a_{2u}$ | $b_{1u}$ | $b_{2u}$ | $e_u$ |
|------------------------------|----------|----------|----------|----------|-------|----------|----------|----------|----------|-------|
| $a_{1g}$                     |          |          |          |          |       |          | X        |          |          | X     |
| $a_{2g}$                     |          |          |          |          |       | X        |          |          |          | X     |
| $b_{1g}$                     |          |          |          |          |       |          |          |          | X        | X     |
| $b_{2g}$                     |          |          |          |          |       |          |          | X        |          | X     |
| $e_g$                        |          |          |          |          |       | X        | X        | X        | X        | X     |
| $a_{1u}$                     |          | X        |          |          | X     |          |          |          |          |       |
| $a_{2u}$                     | X        |          |          |          | X     |          |          |          |          |       |
| $b_{1u}$                     |          |          |          | X        | X     |          |          |          |          |       |
| $b_{2u}$                     |          |          | X        |          | X     |          |          |          |          |       |
| $e_u$                        | X        | X        | X        | X        | X     |          |          |          |          |       |

**Table S2b-ESI.** Localization and symmetry of heavy atom  $1s \rightarrow \pi^*$  transitions

|                            | Transition Symmetry                            |                                                 |
|----------------------------|------------------------------------------------|-------------------------------------------------|
|                            | $a_{2u}$                                       | $e_u$                                           |
| $C^{Py}$ -based            | $1s(a_{1g}) \rightarrow \pi_{\perp}^*(a_{2u})$ | $1s(e_u) \rightarrow \text{SOMO}^a$             |
|                            | $1s(a_{2g}) \rightarrow \pi_{\perp}^*(a_{1u})$ |                                                 |
|                            | $1s(b_{1g}) \rightarrow \pi_{\perp}^*(b_{2u})$ |                                                 |
|                            | $1s(b_{2g}) \rightarrow \pi_{\perp}^*(b_{1u})$ |                                                 |
|                            | $1s(e_u) \rightarrow \pi_{\perp}^*(e_g)$       |                                                 |
| $C^m$ -based               | $1s(a_{1g}) \rightarrow \pi_{\perp}^*(a_{2u})$ |                                                 |
|                            | $1s(b_{2g}) \rightarrow \pi_{\perp}^*(b_{1u})$ |                                                 |
|                            | $1s(e_u) \rightarrow \pi_{\perp}^*(e_g)$       |                                                 |
| $C^{Ph(\perp)}$ -based     | $1s(e_g) \rightarrow \pi_{\parallel}^*(e_u)$   | $1s(a_{1g}) \rightarrow \pi_{\parallel}^*(e_u)$ |
|                            | $1s(e_u) \rightarrow \pi_{\parallel}^*(e_g)$   | $1s(b_{2g}) \rightarrow \pi_{\parallel}^*(e_u)$ |
|                            |                                                | $1s(e_g) \rightarrow \pi_{\parallel}^*(a_{1u})$ |
|                            |                                                | $1s(e_g) \rightarrow \pi_{\parallel}^*(b_{2u})$ |
|                            |                                                | $1s(a_{2u}) \rightarrow \pi_{\parallel}^*(e_g)$ |
| $F^{\perp}$                |                                                | $1s(b_{1u}) \rightarrow \pi_{\parallel}^*(e_g)$ |
|                            |                                                | $1s(e_u) \rightarrow \pi_{\parallel}^*(a_{2g})$ |
|                            |                                                | $1s(e_u) \rightarrow \pi_{\parallel}^*(b_{1g})$ |
|                            |                                                |                                                 |
| $C^{Ph(\parallel)}$ -based | $1s(e_u) \rightarrow \pi_{\parallel}^*(e_g)$   | $1s(a_{1g}) \rightarrow \pi_{\parallel}^*(e_u)$ |
|                            |                                                | $1s(b_{2g}) \rightarrow \pi_{\parallel}^*(e_u)$ |
|                            |                                                | $1s(e_u) \rightarrow \pi_{\parallel}^*(b_{1g})$ |
|                            |                                                | $1s(e_u) \rightarrow \pi_{\parallel}^*(a_{2g})$ |
| $F^{\parallel}$            |                                                |                                                 |
|                            |                                                |                                                 |
|                            |                                                |                                                 |
|                            |                                                |                                                 |
| N-based                    | $1s(a_{1g}) \rightarrow \pi_{\perp}^*(a_{2u})$ | $1s(e_u) \rightarrow \text{SOMO}^a$             |
|                            | $1s(b_{1g}) \rightarrow \pi_{\perp}^*(b_{2u})$ |                                                 |
|                            | $1s(e_u) \rightarrow \pi_{\perp}^*(e_g)$       |                                                 |
|                            |                                                |                                                 |

<sup>a</sup>Both the C-based and N-based  $1s \rightarrow \text{SOMO}$  transitions have a  $1s \rightarrow \sigma^*$  character.

**Table S3-ESI.**  $EE$ s (eV) and oscillator strengths  $f$  for the  $1s^C$  excitation spectrum of CuTPP from spin-unrestricted SR ZORA TD-DFT calculations. Only excitations lying at  $EE$  lower than 290 eV and contributions > 10% are reported.<sup>a,b</sup>

| N  | Atom                                 | sym             | $EE$   | isos                                                                                                                                                                                                                                               | fsos                                                                                                                                                                                                                                                                             | $f(\times 10^3)$   | Assignment                             |
|----|--------------------------------------|-----------------|--------|----------------------------------------------------------------------------------------------------------------------------------------------------------------------------------------------------------------------------------------------------|----------------------------------------------------------------------------------------------------------------------------------------------------------------------------------------------------------------------------------------------------------------------------------|--------------------|----------------------------------------|
| 1  | C <sup>Py(<math>\beta</math>)</sup>  | e <sub>u</sub>  | 280.28 | 10e <sub>u</sub> <sup>↓</sup>                                                                                                                                                                                                                      | 12b <sub>1g</sub> <sup>(100)</sup>                                                                                                                                                                                                                                               | 1.07               |                                        |
| 2  | C <sup>Py(<math>\beta</math>)</sup>  | a <sub>2u</sub> | 281.41 | 11e <sub>u</sub> <sup>↓</sup> +11e <sub>u</sub> <sup>↑</sup> +10e <sub>u</sub> <sup>↓</sup>                                                                                                                                                        | 13e <sub>g</sub> <sup>(50)</sup> +13e <sub>g</sub> <sup>(31)</sup> +13e <sub>g</sub> <sup>(12)</sup>                                                                                                                                                                             | 34.2               | <b>A</b> ( $\pi_{\perp}^*$ )           |
| 3  | C <sup>m</sup>                       | a <sub>2u</sub> | 281.99 | 5e <sub>u</sub> <sup>↓</sup> +5e <sub>u</sub> <sup>↑</sup>                                                                                                                                                                                         | 13e <sub>g</sub> <sup>(66)</sup> +13e <sub>g</sub> <sup>(34)</sup>                                                                                                                                                                                                               | 17.1               | <b>A</b> ( $\pi_{\perp}^*$ )           |
| 4  | C <sup>Py(<math>\alpha</math>)</sup> | a <sub>2u</sub> | 282.44 | 4e <sub>u</sub> <sup>↓</sup> +4e <sub>u</sub> <sup>↑</sup>                                                                                                                                                                                         | 13e <sub>g</sub> <sup>(60)</sup> +13e <sub>g</sub> <sup>(36)</sup>                                                                                                                                                                                                               | 33.1               | <b>A</b> ( $\pi_{\perp}^*$ )           |
| 5  | C <sup>Py(<math>\beta</math>)</sup>  | a <sub>2u</sub> | 282.66 | 7b <sub>2g</sub> <sup>↓</sup> +7b <sub>2g</sub> <sup>↑</sup>                                                                                                                                                                                       | 9b <sub>1u</sub> <sup>(53)</sup> +9b <sub>1u</sub> <sup>(47)</sup>                                                                                                                                                                                                               | 40.5               | <b>A</b> ( $\pi_{\perp}^*$ )           |
| 6  | C <sup>m</sup>                       | a <sub>2u</sub> | 283.20 | 2b <sub>2g</sub> <sup>↓</sup> +2b <sub>2g</sub> <sup>↑</sup>                                                                                                                                                                                       | 9b <sub>1u</sub> <sup>(59)</sup> +9b <sub>1u</sub> <sup>(41)</sup>                                                                                                                                                                                                               | 12.2               | <b>B</b> ( $\pi_{\perp}^*$ )           |
| 7  | C <sub>  </sub> <sup>Ph</sup>        | e <sub>u</sub>  | 283.42 | 9e <sub>u</sub> <sup>↓</sup> +9e <sub>u</sub> <sup>↑</sup> +9a <sub>1g</sub> <sup>↓</sup> +6b <sub>2g</sub> <sup>↓</sup> +9a <sub>1g</sub> <sup>↑</sup> +6b <sub>2g</sub> <sup>↑</sup>                                                             | 9a <sub>2g</sub> <sup>(17)</sup> +9a <sub>2g</sub> <sup>(17)</sup> +32e <sub>u</sub> <sup>(12)</sup> +32e <sub>u</sub> <sup>(12)</sup> +32e <sub>u</sub> <sup>(12)</sup> +32e <sub>u</sub> <sup>(12)</sup>                                                                       | 52.2               | <b>B</b> ( $\pi_{  }^{*-2}e_{2u}$ )    |
| 8  | C <sub>⊥</sub> <sup>Ph</sup>         | e <sub>u</sub>  | 283.44 | 1b <sub>1u</sub> <sup>↓</sup> +2a <sub>2u</sub> <sup>↓</sup> +1b <sub>1u</sub> <sup>↑</sup> +2a <sub>2u</sub> <sup>↑</sup>                                                                                                                         | 14e <sub>g</sub> <sup>(11)</sup> +14e <sub>g</sub> <sup>(11)</sup> +14e <sub>g</sub> <sup>(11)</sup> +14e <sub>g</sub> <sup>(11)</sup>                                                                                                                                           | 46.5               | <b>B</b> ( $\pi_{\perp}^{*-1}e_{2u}$ ) |
| 9  | C <sub>⊥</sub> <sup>Ph</sup>         | e <sub>u</sub>  | 283.45 | 2b <sub>1u</sub> <sup>↓</sup> +3a <sub>2u</sub> <sup>↓</sup> +2b <sub>1u</sub> <sup>↑</sup> +3a <sub>2u</sub> <sup>↑</sup>                                                                                                                         | 14e <sub>g</sub> <sup>(9)</sup> +14e <sub>g</sub> <sup>(9)</sup> +14e <sub>g</sub> <sup>(9)</sup> +14e <sub>g</sub> <sup>(9)</sup>                                                                                                                                               | 167.0 <sup>c</sup> | <b>B</b> ( $\pi_{\perp}^{*-1}e_{2u}$ ) |
| 10 | C <sub>  </sub> <sup>Ph</sup>        | e <sub>u</sub>  | 283.77 | 6e <sub>u</sub> <sup>↓</sup> +6e <sub>u</sub> <sup>↑</sup> +3b <sub>2g</sub> <sup>↓</sup> +6a <sub>1g</sub> <sup>↓</sup> +3b <sub>2g</sub> <sup>↑</sup> +6a <sub>1g</sub> <sup>↑</sup> +6e <sub>u</sub> <sup>↓</sup> +6e <sub>u</sub> <sup>↑</sup> | 9a <sub>2g</sub> <sup>(16)</sup> +9a <sub>2g</sub> <sup>(16)</sup> +32e <sub>u</sub> <sup>(12)</sup> +32e <sub>u</sub> <sup>(12)</sup> +32e <sub>u</sub> <sup>(12)</sup> +32e <sub>u</sub> <sup>(12)</sup> +13b <sub>1g</sub> <sup>(10)</sup> +13b <sub>1g</sub> <sup>(10)</sup> | 49.9               | <b>B</b> ( $\pi_{  }^{*-2}e_{2u}$ )    |
| 11 | C <sup>Py(<math>\beta</math>)</sup>  | a <sub>2u</sub> | 284.75 | 11e <sub>u</sub> <sup>↓</sup> +11e <sub>u</sub> <sup>↑</sup>                                                                                                                                                                                       | 15e <sub>g</sub> <sup>(47)</sup> +15e <sub>g</sub> <sup>(37)</sup>                                                                                                                                                                                                               | 51.0               | <b>C'</b> ( $\pi_{\perp}^*$ )          |
| 12 | C <sup>Py(<math>\beta</math>)</sup>  | a <sub>2u</sub> | 285.14 | 2a <sub>2g</sub> <sup>↓</sup> +2a <sub>2g</sub> <sup>↑</sup>                                                                                                                                                                                       | 4a <sub>1u</sub> <sup>(48)</sup> +4a <sub>1u</sub> <sup>(44)</sup>                                                                                                                                                                                                               | 80.5               | <b>C</b> ( $\pi_{\perp}^*$ )           |
| 13 | C <sup>Py(<math>\alpha</math>)</sup> | a <sub>2u</sub> | 285.32 | 2b <sub>1g</sub> <sup>↓</sup> +2b <sub>1g</sub> <sup>↑</sup>                                                                                                                                                                                       | 5b <sub>2u</sub> <sup>(69)</sup> +5b <sub>2u</sub> <sup>(28)</sup>                                                                                                                                                                                                               | 25.5               | <b>C</b> ( $\pi_{\perp}^*$ )           |
| 14 | C <sup>Py(<math>\alpha</math>)</sup> | a <sub>2u</sub> | 285.76 | 4e <sub>u</sub> <sup>↓</sup> +4e <sub>u</sub> <sup>↑</sup>                                                                                                                                                                                         | 15e <sub>g</sub> <sup>(53)</sup> +15e <sub>g</sub> <sup>(39)</sup>                                                                                                                                                                                                               | 45.6               | <b>C</b> ( $\pi_{\perp}^*$ )           |
| 15 | C <sup>Py(<math>\beta</math>)</sup>  | a <sub>2u</sub> | 285.91 | 7b <sub>2g</sub> <sup>↓</sup> +7b <sub>2g</sub> <sup>↑</sup>                                                                                                                                                                                       | 11b <sub>1u</sub> <sup>(54)</sup> +11b <sub>1u</sub> <sup>(40)</sup>                                                                                                                                                                                                             | 18.6               | <b>C</b> ( $\pi_{\perp}^*$ )           |
| 16 | C <sup>Py(<math>\alpha</math>)</sup> | a <sub>2u</sub> | 286.09 | 1a <sub>2g</sub> <sup>↓</sup> +1a <sub>2g</sub> <sup>↑</sup>                                                                                                                                                                                       | 4a <sub>1u</sub> <sup>(51)</sup> +4a <sub>1u</sub> <sup>(44)</sup>                                                                                                                                                                                                               | 24.7               | <b>C</b> ( $\pi_{\perp}^*$ )           |
| 17 | C <sub>⊥</sub> <sup>Ph</sup>         | a <sub>2u</sub> | 286.12 | 4b <sub>2g</sub> <sup>↓</sup> +7e <sub>u</sub> <sup>↑</sup> +7e <sub>u</sub> <sup>↓</sup>                                                                                                                                                          | 10b <sub>1u</sub> <sup>(15)</sup> +16e <sub>g</sub> <sup>(27)</sup> +16e <sub>g</sub> <sup>(25)</sup>                                                                                                                                                                            | 14.8               | <b>C</b> ( $\sigma^*$ )                |
| 18 | C <sub>⊥</sub> <sup>Ph</sup>         | a <sub>2u</sub> | 286.19 | 4b <sub>2g</sub> <sup>↓</sup> +4b <sub>2g</sub> <sup>↑</sup>                                                                                                                                                                                       | 11b <sub>1u</sub> <sup>(43)</sup> +11b <sub>1u</sub> <sup>(40)</sup>                                                                                                                                                                                                             | 24.2               | <b>C</b> ( $\pi_{\perp}^*$ )           |
| 19 | C <sup>Py(<math>\beta</math>)</sup>  | a <sub>2u</sub> | 286.20 | 11e <sub>u</sub> <sup>↓</sup> +10e <sub>u</sub> <sup>↓</sup> +11e <sub>u</sub> <sup>↑</sup>                                                                                                                                                        | 17e <sub>g</sub> <sup>(42)</sup> +17e <sub>g</sub> <sup>(34)</sup> +17e <sub>g</sub> <sup>(18)</sup>                                                                                                                                                                             | 19.5               | <b>C</b> ( $\pi_{\perp}^*$ )           |
| 20 | C <sup>Py(<math>\alpha</math>)</sup> | a <sub>2u</sub> | 286.38 | 4a <sub>1g</sub> <sup>↓</sup> +4a <sub>1g</sub> <sup>↑</sup>                                                                                                                                                                                       | 13a <sub>2u</sub> <sup>(68)</sup> +13a <sub>2u</sub> <sup>(29)</sup>                                                                                                                                                                                                             | 26.9               | <b>C</b> ( $\pi_{\perp}^*$ )           |
| 21 | C <sup>m</sup>                       | a <sub>2u</sub> | 286.78 | 5e <sub>u</sub> <sup>↓</sup> +5e <sub>u</sub> <sup>↑</sup>                                                                                                                                                                                         | 17e <sub>g</sub> <sup>(70)</sup> +17e <sub>g</sub> <sup>(29)</sup>                                                                                                                                                                                                               | 16.9               | <b>D</b> ( $\pi_{\perp}^*$ )           |
| 22 | C <sub>  </sub> <sup>Ph</sup>        | e <sub>u</sub>  | 286.85 | 6b <sub>2g</sub> <sup>↑</sup> +9a <sub>1g</sub> <sup>↑</sup> +6b <sub>2g</sub> <sup>↓</sup> +9a <sub>1g</sub> <sup>↓</sup>                                                                                                                         | 37e <sub>u</sub> <sup>(17)</sup> +37e <sub>u</sub> <sup>(17)</sup> +37e <sub>u</sub> <sup>(16)</sup> +37e <sub>u</sub> <sup>(16)</sup>                                                                                                                                           | 11.6               | <b>D</b> ( $\sigma^*$ )                |
| 23 | C <sup>Py(<math>\alpha</math>)</sup> | a <sub>2u</sub> | 286.93 | 1b <sub>2g</sub> <sup>↓</sup> +1b <sub>2g</sub> <sup>↑</sup>                                                                                                                                                                                       | 11b <sub>1u</sub> <sup>(47)</sup> +11b <sub>1u</sub> <sup>(42)</sup>                                                                                                                                                                                                             | 23.5               | <b>D</b> ( $\pi_{\perp}^*$ )           |
| 24 | C <sup>Py(<math>\alpha</math>)</sup> | a <sub>2u</sub> | 287.33 | 3e <sub>u</sub> <sup>↓</sup> +3e <sub>u</sub> <sup>↑</sup>                                                                                                                                                                                         | 17e <sub>g</sub> <sup>(51)</sup> +17e <sub>g</sub> <sup>(42)</sup>                                                                                                                                                                                                               | 123.0              | <b>D</b> ( $\pi_{\perp}^*$ )           |
| 25 | C <sup>Py(<math>\alpha</math>)</sup> | a <sub>2u</sub> | 287.86 | 3e <sub>u</sub> <sup>↓</sup> +3e <sub>u</sub> <sup>↑</sup>                                                                                                                                                                                         | 18e <sub>g</sub> <sup>(57)</sup> +18e <sub>g</sub> <sup>(40)</sup>                                                                                                                                                                                                               | 16.9               | <b>D</b> ( $\pi_{\perp}^*$ )           |
| 26 | C <sup>Py(<math>\alpha</math>)</sup> | a <sub>2u</sub> | 288.13 | 4a <sub>1g</sub> <sup>↓</sup> +4a <sub>1g</sub> <sup>↑</sup>                                                                                                                                                                                       | 16a <sub>2u</sub> <sup>(89)</sup> +16a <sub>2u</sub> <sup>(10)</sup>                                                                                                                                                                                                             | 10.6               | <b>D</b> ( $\pi_{\perp}^*$ )           |

<sup>a</sup>The lowest lying transition herein reported has a  $f^C = 1.1 \times 10^{-3}$ ; nevertheless, it has been included because it is the only transition having a  $1s^C \rightarrow 3d^{Cu}$  character.

<sup>b</sup>The fso character is reported in parenthesis.

<sup>c</sup>All the contributions are < 10%; those reported are the largest ones.

**Table S4-ESI.** *EEs* (eV) and oscillator strengths *f* for the  $1s^C$  excitation spectrum of CuTPP(F) from spin-unrestricted SR ZORA TD-DFT calculations. Only excitations lying at *EE* lower than 290 eV and contributions > 10% are reported.<sup>a,b</sup>

| N  | Atom                                 | sym             | <i>EE</i> | <i>isos</i>                                                                                                                                                                                                                                          | <i>fsos</i>                                                                                                                                                                                                                                                                        | <i>f</i> ( $\times 10^3$ ) | Assignment                                                      |
|----|--------------------------------------|-----------------|-----------|------------------------------------------------------------------------------------------------------------------------------------------------------------------------------------------------------------------------------------------------------|------------------------------------------------------------------------------------------------------------------------------------------------------------------------------------------------------------------------------------------------------------------------------------|----------------------------|-----------------------------------------------------------------|
| 1  | C <sup>Py(<math>\beta</math>)</sup>  | e <sub>u</sub>  | 280.26    | 13e <sub>u</sub> <sup>↓</sup>                                                                                                                                                                                                                        | 15b <sub>1g</sub> <sup>(100)</sup>                                                                                                                                                                                                                                                 | 1.05                       |                                                                 |
| 2  | C <sup>Py(<math>\beta</math>)</sup>  | a <sub>2u</sub> | 281.33    | 14e <sub>u</sub> <sup>↓</sup> +14e <sub>u</sub> <sup>↑</sup> +13e <sub>u</sub> <sup>↓</sup>                                                                                                                                                          | 22e <sub>g</sub> <sup>(50)</sup> +22e <sub>g</sub> <sup>(31)</sup> +22e <sub>g</sub> <sup>(12)</sup>                                                                                                                                                                               | 34.3                       | <b>A</b> ( $\pi_{\perp}^*$ )                                    |
| 3  | C <sup>m</sup>                       | a <sub>2u</sub> | 282.29    | 12e <sub>u</sub> <sup>↓</sup> +12e <sub>u</sub> <sup>↑</sup>                                                                                                                                                                                         | 22e <sub>g</sub> <sup>(55)</sup> +22e <sub>g</sub> <sup>(44)</sup>                                                                                                                                                                                                                 | 42.2                       | <b>A'+B'</b> ( $\pi_{\perp}^*$ )                                |
| 4  | C <sup>Py(<math>\alpha</math>)</sup> | a <sub>2u</sub> | 282.46    | 11e <sub>u</sub> <sup>↓</sup> +11e <sub>u</sub> <sup>↑</sup>                                                                                                                                                                                         | 22e <sub>g</sub> <sup>(56)</sup> +22e <sub>g</sub> <sup>(36)</sup>                                                                                                                                                                                                                 | 36.3                       | <b>A'+B'</b> ( $\pi_{\perp}^*$ )                                |
| 5  | C <sup>Py(<math>\beta</math>)</sup>  | a <sub>2u</sub> | 282.58    | 10b <sub>2g</sub> <sup>↓</sup> +10b <sub>2g</sub> <sup>↑</sup> +3b <sub>1g</sub> <sup>↑</sup> +3b <sub>1g</sub> <sup>↓</sup>                                                                                                                         | 16b <sub>1u</sub> <sup>(35)</sup> +16b <sub>1u</sub> <sup>(31)</sup> +6b <sub>2u</sub> <sup>(16)</sup> +6b <sub>2u</sub> <sup>(11)</sup>                                                                                                                                           | 22.4                       | <b>B'+B</b> ( $\pi_{\perp}^*$ + $\pi_{\parallel}^{*-1}e_{2u}$ ) |
| 6  | C <sup>m</sup>                       | a <sub>2u</sub> | 283.48    | 9b <sub>2g</sub> <sup>↓</sup> +9b <sub>2g</sub> <sup>↑</sup> +12e <sub>u</sub> <sup>↑</sup> +12e <sub>u</sub> <sup>↓</sup>                                                                                                                           | 16b <sub>1u</sub> <sup>(41)</sup> +16b <sub>1u</sub> <sup>(37)</sup> +23e <sub>g</sub> <sup>(12)</sup> +23e <sub>g</sub> <sup>(10)</sup>                                                                                                                                           | 21.3                       | <b>B'+B</b> ( $\pi_{\perp}^*$ + $\pi_{\parallel}^{*-1}e_{2u}$ ) |
| 7  | C <sup>m</sup>                       | a <sub>2u</sub> | 283.51    | 12e <sub>u</sub> <sup>↓</sup> +12e <sub>u</sub> <sup>↑</sup> +9b <sub>2g</sub> <sup>↓</sup> +9b <sub>2g</sub> <sup>↑</sup>                                                                                                                           | 23e <sub>g</sub> <sup>(46)</sup> +23e <sub>g</sub> <sup>(32)</sup> +16b <sub>1u</sub> <sup>(11)</sup> +16b <sub>1u</sub> <sup>(10)</sup>                                                                                                                                           | 11.0                       | <b>B'+B</b> ( $\pi_{\parallel}^{*-1}e_{2u}$ + $\pi_{\perp}^*$ ) |
| 8  | C <sub>  </sub> <sup>Ph</sup>        | e <sub>u</sub>  | 284.16    | 9e <sub>u</sub> <sup>↓</sup> +9e <sub>u</sub> <sup>↑</sup> +7b <sub>2g</sub> <sup>↓</sup> +10a <sub>1g</sub> <sup>↓</sup> +7b <sub>2g</sub> <sup>↑</sup> +10a <sub>1g</sub> <sup>↑</sup> +9e <sub>u</sub> <sup>↓</sup> +9e <sub>u</sub> <sup>↑</sup> | 12a <sub>2g</sub> <sup>(16)</sup> +12a <sub>2g</sub> <sup>(16)</sup> +43e <sub>u</sub> <sup>(12)</sup> +43e <sub>u</sub> <sup>(12)</sup> +43e <sub>u</sub> <sup>(12)</sup> +43e <sub>u</sub> <sup>(12)</sup> +16b <sub>1g</sub> <sup>(10)</sup> +16b <sub>1g</sub> <sup>(10)</sup> | 50.6                       | <b>C'</b> ( $\pi_{\parallel}^{*-2}e_{2u}$ )                     |
| 9  | C <sup>Py(<math>\beta</math>)</sup>  | a <sub>2u</sub> | 284.72    | 14e <sub>u</sub> <sup>↓</sup> +14e <sub>u</sub> <sup>↑</sup> +10b <sub>2g</sub> <sup>↑</sup>                                                                                                                                                         | 24e <sub>g</sub> <sup>(38)</sup> +24e <sub>g</sub> <sup>(32)</sup> +17b <sub>1u</sub> <sup>(11)</sup>                                                                                                                                                                              | 29.6                       | <b>C'</b> ( $\pi_{\perp}^*$ + $\sigma^*$ )                      |
| 10 | C <sup>Py(<math>\beta</math>)</sup>  | a <sub>2u</sub> | 284.76    | 10b <sub>2g</sub> <sup>↓</sup> +10b <sub>2g</sub> <sup>↑</sup>                                                                                                                                                                                       | 17b <sub>1u</sub> <sup>(46)</sup> +17b <sub>1u</sub> <sup>(36)</sup>                                                                                                                                                                                                               | 14.4                       | <b>C'</b> ( $\sigma^*$ + $\pi_{\perp}^*$ )                      |
| 11 | C <sup>Py(<math>\beta</math>)</sup>  | a <sub>2u</sub> | 285.15    | 2a <sub>2g</sub> <sup>↓</sup> +2a <sub>2g</sub> <sup>↑</sup>                                                                                                                                                                                         | 6a <sub>1u</sub> <sup>(48)</sup> +6a <sub>1u</sub> <sup>(44)</sup>                                                                                                                                                                                                                 | 86.6                       | <b>C</b> ( $\pi_{\perp}^*$ )                                    |
| 12 | C <sup>Py(<math>\alpha</math>)</sup> | a <sub>2u</sub> | 285.41    | 2b <sub>1g</sub> <sup>↓</sup> +2b <sub>1g</sub> <sup>↑</sup>                                                                                                                                                                                         | 7b <sub>2u</sub> <sup>(69)</sup> +7b <sub>2u</sub> <sup>(28)</sup>                                                                                                                                                                                                                 | 24.8                       | <b>C</b> ( $\pi_{\perp}^*$ )                                    |
| 13 | C <sup>Py(<math>\alpha</math>)</sup> | a <sub>2u</sub> | 285.80    | 11e <sub>u</sub> <sup>↓</sup> +11e <sub>u</sub> <sup>↑</sup>                                                                                                                                                                                         | 24e <sub>g</sub> <sup>(47)</sup> +24e <sub>g</sub> <sup>(37)</sup>                                                                                                                                                                                                                 | 16.6                       | <b>C</b> ( $\pi_{\perp}^*$ )                                    |
| 14 | C <sup>Py(<math>\alpha</math>)</sup> | a <sub>2u</sub> | 286.01    | 11e <sub>u</sub> <sup>↓</sup> +10e <sub>u</sub> <sup>↓</sup> +10e <sub>u</sub> <sup>↑</sup> +11e <sub>u</sub> <sup>↑</sup>                                                                                                                           | 25e <sub>g</sub> <sup>(28)</sup> +25e <sub>g</sub> <sup>(22)</sup> +25e <sub>g</sub> <sup>(17)</sup> +25e <sub>g</sub> <sup>(17)</sup>                                                                                                                                             | 29.6                       | <b>C</b> ( $\sigma^*$ + $\pi_{\perp}^*$ )                       |
| 15 | C <sub>  </sub> <sup>Ph</sup>        | e <sub>u</sub>  | 286.13    | 6e <sub>u</sub> <sup>↓</sup> +6e <sub>u</sub> <sup>↑</sup> +4b <sub>2g</sub> <sup>↓</sup> +7a <sub>1g</sub> <sup>↓</sup> +4b <sub>2g</sub> <sup>↑</sup> +7a <sub>1g</sub> <sup>↑</sup> +6e <sub>u</sub> <sup>↓</sup> +6e <sub>u</sub> <sup>↑</sup>   | 12a <sub>2g</sub> <sup>(16)</sup> +12a <sub>2g</sub> <sup>(16)</sup> +43e <sub>u</sub> <sup>(12)</sup> +43e <sub>u</sub> <sup>(12)</sup> +43e <sub>u</sub> <sup>(12)</sup> +43e <sub>u</sub> <sup>(12)</sup> +16b <sub>1g</sub> <sup>(10)</sup> +16b <sub>1g</sub> <sup>(10)</sup> | 48.0                       | <b>C</b> ( $\pi_{\parallel}^{*-2}e_{2u}$ )                      |
| 16 | C <sup>Py(<math>\beta</math>)</sup>  | a <sub>2u</sub> | 286.15    | 10b <sub>2g</sub> <sup>↓</sup> +10b <sub>2g</sub> <sup>↑</sup>                                                                                                                                                                                       | 18b <sub>1u</sub> <sup>(55)</sup> +18b <sub>1u</sub> <sup>(42)</sup>                                                                                                                                                                                                               | 19.3                       | <b>C</b> ( $\pi_{\perp}^*$ + $\sigma^*$ )                       |
| 17 | C <sub>⊥</sub> <sup>Ph</sup>         | e <sub>u</sub>  | 286.16    | 4b <sub>1u</sub> <sup>↓</sup> +5a <sub>2u</sub> <sup>↓</sup> +4b <sub>1u</sub> <sup>↑</sup> +5a <sub>2u</sub> <sup>↑</sup> +4e <sub>g</sub> <sup>↑</sup> +4e <sub>g</sub> <sup>↓</sup> +4e <sub>g</sub> <sup>↑</sup> +4e <sub>g</sub> <sup>↓</sup>   | 23e <sub>g</sub> <sup>(12)</sup> +23e <sub>g</sub> <sup>(12)</sup> +23e <sub>g</sub> <sup>(12)</sup> +23e <sub>g</sub> <sup>(12)</sup> +5a <sub>1u</sub> <sup>(11)</sup> +5a <sub>1u</sub> <sup>(11)</sup> +6b <sub>2u</sub> <sup>(10)</sup> +6b <sub>2u</sub> <sup>(10)</sup>     | 119.0                      | <b>C</b> ( $\pi_{\parallel}^{*-1}e_{2u}$ )                      |
| 18 | C <sub>⊥</sub> <sup>Ph</sup>         | e <sub>u</sub>  | 286.17    | 8a <sub>1g</sub> <sup>↑</sup> +5b <sub>2g</sub> <sup>↑</sup> +8a <sub>1g</sub> <sup>↓</sup> +5b <sub>2g</sub> <sup>↓</sup>                                                                                                                           | 44e <sub>u</sub> <sup>(17)</sup> +44e <sub>u</sub> <sup>(17)</sup> +44e <sub>u</sub> <sup>(14)</sup> +44e <sub>u</sub> <sup>(14)</sup>                                                                                                                                             | 26.7                       | <b>C</b> ( $\sigma^*$ )                                         |
| 19 | C <sub>⊥</sub> <sup>Ph</sup>         | e <sub>u</sub>  | 286.18    | 5b <sub>2g</sub> <sup>↓</sup> +8a <sub>1g</sub> <sup>↓</sup>                                                                                                                                                                                         | 44e <sub>u</sub> <sup>(10)</sup> +44e <sub>u</sub> <sup>(10)</sup>                                                                                                                                                                                                                 | 49.3                       | <b>C</b> ( $\sigma^*$ )                                         |
| 20 | C <sup>Py(<math>\alpha</math>)</sup> | a <sub>2u</sub> | 286.21    | 1a <sub>2g</sub> <sup>↓</sup> +1a <sub>2g</sub> <sup>↑</sup>                                                                                                                                                                                         | 6a <sub>1u</sub> <sup>(49)</sup> +6a <sub>1u</sub> <sup>(43)</sup>                                                                                                                                                                                                                 | 44.5                       | <b>C</b> ( $\pi_{\perp}^*$ )                                    |
| 21 | C <sub>⊥</sub> <sup>Ph</sup>         | a <sub>2u</sub> | 286.26    | 3b <sub>1u</sub> <sup>↓</sup> +3b <sub>1u</sub> <sup>↑</sup> +3e <sub>g</sub> <sup>↓</sup> +3e <sub>g</sub> <sup>↑</sup>                                                                                                                             | 28b <sub>2g</sub> <sup>(21)</sup> +28b <sub>2g</sub> <sup>(21)</sup> +44e <sub>u</sub> <sup>(23)</sup> +44e <sub>u</sub> <sup>(23)</sup>                                                                                                                                           | 30.9                       | <b>C</b> ( $\sigma^*$ )                                         |
| 22 | C <sub>  </sub> <sup>Ph</sup>        | e <sub>u</sub>  | 286.38    | 6e <sub>u</sub> <sup>↓</sup> +6e <sub>u</sub> <sup>↑</sup> +4b <sub>2g</sub> <sup>↓</sup> +7a <sub>1g</sub> <sup>↓</sup> +4b <sub>2g</sub> <sup>↑</sup> +7a <sub>1g</sub> <sup>↑</sup>                                                               | 28b <sub>2g</sub> <sup>(19)</sup> +28b <sub>2g</sub> <sup>(19)</sup> +44e <sub>u</sub> <sup>(12)</sup> +44e <sub>u</sub> <sup>(12)</sup> +44e <sub>u</sub> <sup>(12)</sup> +44e <sub>u</sub> <sup>(12)</sup>                                                                       | 13.7                       | <b>C</b> ( $\sigma^*$ )                                         |
| 23 | C <sup>Py(<math>\beta</math>)</sup>  | a <sub>2u</sub> | 286.39    | 14e <sub>u</sub> <sup>↓</sup> +14e <sub>u</sub> <sup>↑</sup> +13e <sub>u</sub> <sup>↓</sup>                                                                                                                                                          | 26e <sub>g</sub> <sup>(43)</sup> +26e <sub>g</sub> <sup>(24)</sup> +26e <sub>g</sub> <sup>(22)</sup>                                                                                                                                                                               | 37.4                       | <b>C</b> ( $\pi_{\perp}^*$ )                                    |
| 24 | C <sup>Py(<math>\alpha</math>)</sup> | a <sub>2u</sub> | 286.77    | 11a <sub>1g</sub> <sup>↓</sup> +11a <sub>1g</sub> <sup>↑</sup>                                                                                                                                                                                       | 21a <sub>2u</sub> <sup>(70)</sup> +21a <sub>2u</sub> <sup>(28)</sup>                                                                                                                                                                                                               | 23.3                       | <b>D</b> ( $\pi_{\perp}^*$ + $\sigma^*$ )                       |
| 25 | C <sup>Py(<math>\alpha</math>)</sup> | a <sub>2u</sub> | 287.27    | 8b <sub>2g</sub> <sup>↓</sup> +8b <sub>2g</sub> <sup>↑</sup>                                                                                                                                                                                         | 18b <sub>1u</sub> <sup>(49)</sup> +18b <sub>1u</sub> <sup>(44)</sup>                                                                                                                                                                                                               | 16.7                       | <b>D</b> ( $\pi_{\perp}^*$ + $\sigma^*$ )                       |
| 26 | C <sup>m</sup>                       | a <sub>2u</sub> | 287.35    | 12e <sub>u</sub> <sup>↓</sup> +12e <sub>u</sub> <sup>↑</sup>                                                                                                                                                                                         | 26e <sub>g</sub> <sup>(52)</sup> +26e <sub>g</sub> <sup>(41)</sup>                                                                                                                                                                                                                 | 53.9                       | <b>D</b> ( $\pi_{\perp}^*$ )                                    |
| 27 | C <sup>Py(<math>\alpha</math>)</sup> | a <sub>2u</sub> | 287.61    | 10e <sub>u</sub> <sup>↓</sup> +10e <sub>u</sub> <sup>↑</sup>                                                                                                                                                                                         | 26e <sub>g</sub> <sup>(50)</sup> +26e <sub>g</sub> <sup>(41)</sup>                                                                                                                                                                                                                 | 134.0                      | <b>D</b> ( $\pi_{\perp}^*$ )                                    |
| 28 | C <sup>m</sup>                       | a <sub>2u</sub> | 287.81    | 12a <sub>1g</sub> <sup>↓</sup> +12a <sub>1g</sub> <sup>↑</sup>                                                                                                                                                                                       | 22a <sub>2u</sub> <sup>(69)</sup> +22a <sub>2u</sub> <sup>(29)</sup>                                                                                                                                                                                                               | 14.0                       | <b>D</b> ( $\pi_{\perp}^*$ + $\sigma^*$ )                       |
| 29 | C <sub>  </sub> <sup>Ph</sup>        | e <sub>u</sub>  | 287.83    | 9e <sub>u</sub> <sup>↓</sup> +9e <sub>u</sub> <sup>↑</sup> +9e <sub>u</sub> <sup>↑</sup> +9e <sub>u</sub> <sup>↓</sup>                                                                                                                               | 13a <sub>2g</sub> <sup>(19)</sup> +13a <sub>2g</sub> <sup>(19)</sup> +18b <sub>1g</sub> <sup>(11)</sup> +18b <sub>1g</sub> <sup>(11)</sup>                                                                                                                                         | 28.9                       | <b>D</b> ( $\sigma^*$ )                                         |
| 30 | C <sub>⊥</sub> <sup>Ph</sup>         | a <sub>2u</sub> | 288.21    | 8e <sub>u</sub> <sup>↓</sup> +8e <sub>u</sub> <sup>↑</sup>                                                                                                                                                                                           | 25e <sub>g</sub> <sup>(49)</sup> +25e <sub>g</sub> <sup>(40)</sup>                                                                                                                                                                                                                 | 29.5                       | <b>D</b> ( $\sigma^*$ + $\pi_{\perp}^*$ )                       |
| 31 | C <sub>⊥</sub> <sup>Ph</sup>         | a <sub>2u</sub> | 288.27    | 7e <sub>u</sub> <sup>↓</sup> +7e <sub>u</sub> <sup>↑</sup>                                                                                                                                                                                           | 25e <sub>g</sub> <sup>(48)</sup> +25e <sub>g</sub> <sup>(40)</sup>                                                                                                                                                                                                                 | 55.9                       | <b>D</b> ( $\sigma^*$ + $\pi_{\perp}^*$ )                       |
| 32 | C <sub>  </sub> <sup>Ph</sup>        | e <sub>u</sub>  | 289.82    | 6e <sub>u</sub> <sup>↓</sup> +6e <sub>u</sub> <sup>↑</sup> +6e <sub>u</sub> <sup>↓</sup> +6e <sub>u</sub> <sup>↑</sup>                                                                                                                               | 13a <sub>2g</sub> <sup>(15)</sup> +13a <sub>2g</sub> <sup>(15)</sup> +18b <sub>1g</sub> <sup>(13)</sup> +18b <sub>1g</sub> <sup>(13)</sup>                                                                                                                                         | 25.6                       | <b>D</b> ( $\sigma^*$ )                                         |

<sup>a</sup>The fso character is reported in parenthesis.

<sup>b</sup>The lowest lying transition has a  $f^C = 1.05 \times 10^{-3}$ ; nevertheless, it has been herein included because it is the only transition having a  $1s^C \rightarrow 3d^{Cu}$  character.

**Table S5-ESI.** *EEs* (eV) and oscillator strengths *f* for the  $1s^N$  excitation spectrum of CuTPP from spin-unrestricted SR ZORA TD-DFT calculations. Only excitations up to *EE* 400 eV and contributions > 10% are reported.<sup>a,b</sup>

| N | sym      | <i>EE</i> | isos                                    | fsos                              | <i>f</i> ( $\times 10^3$ ) | Assignment                         |
|---|----------|-----------|-----------------------------------------|-----------------------------------|----------------------------|------------------------------------|
| 1 | $e_u$    | 394.18    | $2e_u^\downarrow$                       | $12b_{1g}^{(100)}$                | 9.0                        | <b>A</b> ( $^{Cu}\sigma^*$ )       |
| 2 | $a_{2u}$ | 395.29    | $2e_u^\downarrow + 2e_u^\uparrow$       | $13e_g^{(72)} + 13e_g^{(28)}$     | 17.7                       | <b>A</b> ( $^{pmc}\pi_{\perp}^*$ ) |
| 3 | $a_{2u}$ | 398.18    | $1b_{1g}^\downarrow + 1b_{1g}^\uparrow$ | $5b_{2u}^{(71)} + 5b_{2u}^{(26)}$ | 20.2                       | <b>C</b> ( $^{pmc}\pi_{\perp}^*$ ) |
| 4 | $a_{2u}$ | 398.59    | $2e_u^\downarrow + 2e_u^\uparrow$       | $15e_g^{(71)} + 15e_g^{(26)}$     | 21.5                       | <b>C</b> ( $^{pmc}\pi_{\perp}^*$ ) |

<sup>a</sup>The fso character is reported in parenthesis.

<sup>b</sup>The lowest lying transition herein reported has a  $f^N < 10 \times 10^{-3}$ , nevertheless it has been included because it is the only one having a  $1s^N \rightarrow \sigma^*$  character.

**Table S6-ESI.** *EEs* (eV) and oscillator strengths *f* for the  $1s^N$  excitation spectrum of CuTPP(F) from spin-unrestricted SR ZORA TD-DFT calculations. Only excitations up to *EE* 400 eV and contributions > 10% are reported.<sup>a,b</sup>

| N | sym      | <i>EE</i> | isos                                    | fsos                              | <i>f</i> ( $\times 10^3$ ) | Assignment                                         |
|---|----------|-----------|-----------------------------------------|-----------------------------------|----------------------------|----------------------------------------------------|
| 1 | $e_u$    | 394.20    | $5e_u^\downarrow$                       | $15b_{1g}^{(100)}$                | 9.0                        | <b>A</b> ( $^{Cu}\sigma^*$ )                       |
| 2 | $a_{2u}$ | 395.22    | $5e_u^\uparrow + 5e_u^\downarrow$       | $22e_g^{(73)} + 22e_g^{(27)}$     | 16.6                       | <b>A</b> ( $^{pmc}\pi_{\perp}^*$ )                 |
| 3 | $a_{2u}$ | 398.19    | $1b_{1g}^\downarrow + 1b_{1g}^\uparrow$ | $7b_{2u}^{(70)} + 7b_{2u}^{(27)}$ | 20.1                       | <b>C</b> ( $^{pmc}\pi_{\perp}^*$ )                 |
| 4 | $a_{2u}$ | 398.82    | $5e_u^\downarrow + 5e_u^\uparrow$       | $25e_g^{(73)} + 25e_g^{(23)}$     | 16.2                       | <b>C</b> ( $^{pmc}\pi_{\perp}^* + ^{ph}\sigma^*$ ) |

<sup>a</sup>The fso character is reported in parenthesis.

<sup>b</sup>The lowest lying transition herein reported has a  $f^N < 10 \times 10^{-3}$ , nevertheless it has been included because it is the only one having a  $1s^N \rightarrow \sigma^*$  character.

**Table S7.** *EEs* (eV) and oscillator strengths *f* for the 1s<sup>F</sup> excitation spectrum of CuTPP(F) from spin-unrestricted SR ZORA TD-DFT calculations. Only excitations lying at *EE* lower than 685 eV and contributions > 10% are reported.<sup>a</sup>

| N | sym             | <i>EE</i> | isos                                                                                                                                                                                   | fsos                                                                                                                                                                                                         | <i>f</i> (× 10 <sup>3</sup> ) | Assignment                                        |
|---|-----------------|-----------|----------------------------------------------------------------------------------------------------------------------------------------------------------------------------------------|--------------------------------------------------------------------------------------------------------------------------------------------------------------------------------------------------------------|-------------------------------|---------------------------------------------------|
| 1 | e <sub>u</sub>  | 681.26    | 2b <sub>1u</sub> <sup>↓</sup> +3a <sub>2u</sub> <sup>↓</sup> +2b <sub>1u</sub> <sup>↑</sup> +3a <sub>2u</sub> <sup>↑</sup> +2e <sub>g</sub> <sup>↑</sup> +2e <sub>g</sub> <sup>↓</sup> | 23e <sub>g</sub> <sup>(15)</sup> +23e <sub>g</sub> <sup>(15)</sup> +23e <sub>g</sub> <sup>(15)</sup> +23e <sub>g</sub> <sup>(15)</sup> +5a <sub>1u</sub> <sup>(11)</sup> +5a <sub>1u</sub> <sup>(11)</sup>   | 13.2                          | (π <sub>  </sub> <sup>*-1</sup> e <sub>2u</sub> ) |
| 2 | e <sub>u</sub>  | 681.35    | 1b <sub>1u</sub> <sup>↓</sup> +2a <sub>2u</sub> <sup>↓</sup> +1b <sub>1u</sub> <sup>↑</sup> +2a <sub>2u</sub> <sup>↑</sup> +1e <sub>g</sub> <sup>↑</sup> +1e <sub>g</sub> <sup>↓</sup> | 23e <sub>g</sub> <sup>(15)</sup> +23e <sub>g</sub> <sup>(15)</sup> +23e <sub>g</sub> <sup>(15)</sup> +23e <sub>g</sub> <sup>(15)</sup> +5a <sub>1u</sub> <sup>(11)</sup> +5a <sub>1u</sub> <sup>(11)</sup>   | 12.8                          | (π <sub>  </sub> <sup>*-1</sup> e <sub>2u</sub> ) |
| 3 | a <sub>2u</sub> | 681.53    | 2b <sub>1u</sub> <sup>↓</sup> +2b <sub>1u</sub> <sup>↑</sup> +2e <sub>g</sub> <sup>↓</sup> +2e <sub>g</sub> <sup>↑</sup>                                                               | 28b <sub>2g</sub> <sup>(19)</sup> +28b <sub>2g</sub> <sup>(19)</sup> +44e <sub>u</sub> <sup>(23)</sup> +44e <sub>u</sub> <sup>(23)</sup>                                                                     | 14.4                          | (σ <sup>*</sup> )                                 |
| 4 | a <sub>2u</sub> | 681.68    | 1b <sub>1u</sub> <sup>↓</sup> +1b <sub>1u</sub> <sup>↑</sup> +1e <sub>g</sub> <sup>↓</sup> +1e <sub>g</sub> <sup>↑</sup>                                                               | 28b <sub>2g</sub> <sup>(17)</sup> +28b <sub>2g</sub> <sup>(17)</sup> +44e <sub>u</sub> <sup>(24)</sup> +44e <sub>u</sub> <sup>(24)</sup>                                                                     | 29.6                          | (σ <sup>*</sup> )                                 |
| 5 | e <sub>u</sub>  | 681.81    | 2e <sub>u</sub> <sup>↓</sup> +2e <sub>u</sub> <sup>↑</sup> +1b <sub>2g</sub> <sup>↓</sup> +3a <sub>1g</sub> <sup>↓</sup> +1b <sub>2g</sub> <sup>↑</sup> +3a <sub>1g</sub>              | 28b <sub>2g</sub> <sup>(16)</sup> +28b <sub>2g</sub> <sup>(16)</sup> +44e <sub>u</sub> <sup>(12)</sup> +44e <sub>u</sub> <sup>(12)</sup> +44e <sub>u</sub> <sup>(12)</sup> +44e <sub>u</sub> <sup>(12)</sup> | 12.1                          | (σ <sup>*</sup> )                                 |

<sup>a</sup>The fso character is reported in parenthesis.
